# Supplementary material
Source: PubMed Central journal article supplement (PMC6904850)
Supplement: NIHMS1035271-supplement-1.pdf [file NIHMS1035271-supplement-1.pdf]

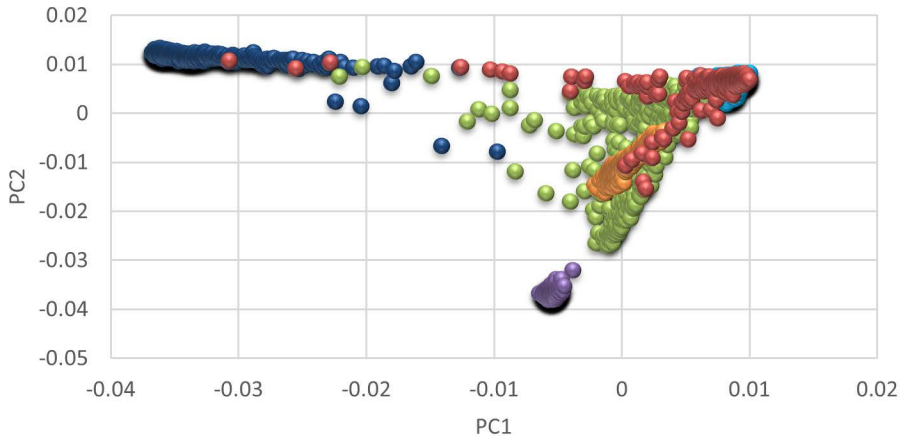

● AFR ● AMR ● EAS ● SAS ● EUR ● BioVU EA

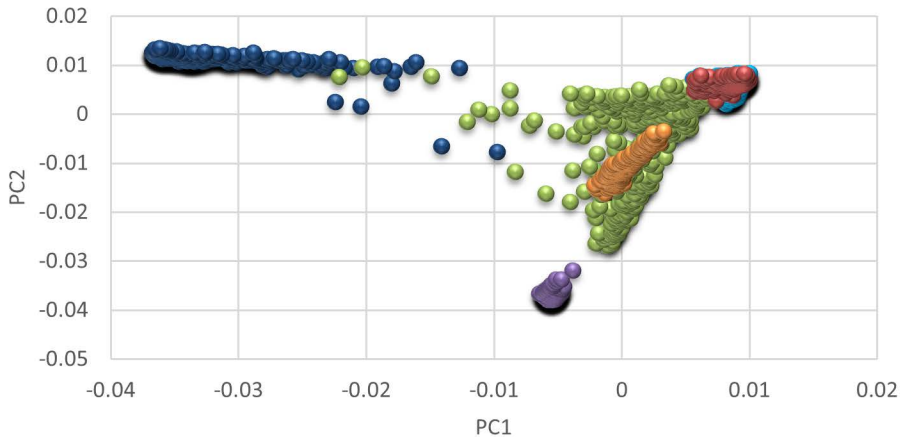

● AFR ● AMR ● EAS ● SAS ● EUR ● BioVU EA

Estimated Heritability Explained by Each Chromosome

0.08  
0.06  
0.04  
0.02  
0.00

50

Chromosome Length (Mb)

100

150

200

250

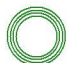

All Data

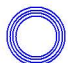

Lacking 8p

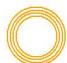

Lacking 8q

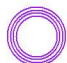

Lacking 8p23.1-8p22

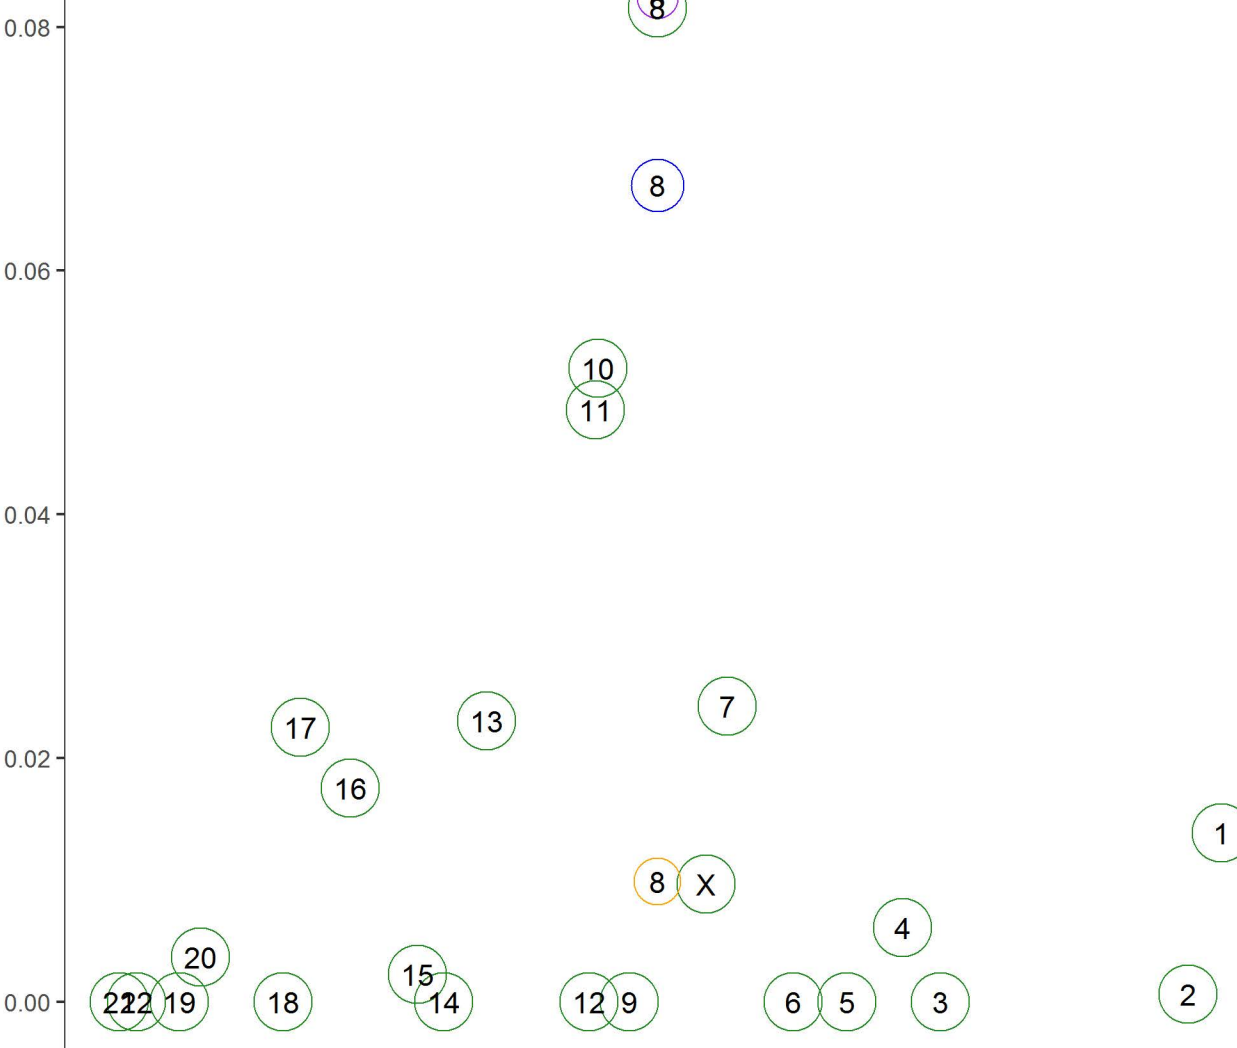

## **SUPPLEMENTAL INFORMATION**

### **FIGURE LEGENDS**

**Supplemental Figure-1.** Principal components plot of BioVU EAs with reference population before pruning outliers. AFR-African; AMR-Ad Mixed American; EAS-East Asian; SAS-South Asian; EUR-European.

**Supplemental Figure-2.** Principal components plot of BioVU EAs with reference population after pruning outliers. AFR-African; AMR-Ad Mixed American; EAS-East Asian; SAS-South Asian; EUR-European.

**Supplemental Figure-3.** Estimated SNP- based heritability of each chromosome by chromosome length in Mb with sections of chromosome 8 removed. To help all models converge, the model used to produce this figure adjusted for age, BMI, and 7 PCs with a prevalence estimate at 70%.

**Supplemental Table 1. Heritability estimates for fibroid risk using European Americans within BioVU.**

| Heritability Estimate $\pm$ (Std. Err.) | P-value            | PC Adjustments |
|-----------------------------------------|--------------------|----------------|
| 0.38 $\pm$ (0.18)                       | 0.013 <sup>a</sup> | 0              |
| 0.34 $\pm$ (0.18)                       | 0.031 <sup>a</sup> | 1              |
| 0.35 $\pm$ (0.18)                       | 0.027 <sup>a</sup> | 2              |
| 0.33 $\pm$ (0.18)                       | 0.037 <sup>a</sup> | 3              |
| 0.33 $\pm$ (0.18)                       | 0.038 <sup>a</sup> | 4              |
| 0.33 $\pm$ (0.18)                       | 0.040 <sup>a</sup> | 5              |
| 0.33 $\pm$ (0.18)                       | 0.040 <sup>a</sup> | 6              |
| 0.29 $\pm$ (0.18)                       | 0.064              | 7              |
| 0.29 $\pm$ (0.18)                       | 0.058              | 8              |
| 0.30 $\pm$ (0.18)                       | 0.053              | 9              |
| 0.30 $\pm$ (0.18)                       | 0.056              | 10             |

Model: Adjusted for age and BMI and noted PC number in table.

SNPs are limited to  $\geq 5\%$  MAF.

Prevalence estimates of fibroids are set at 70%.

<sup>a</sup>Statistically significant

**Supplemental Table 2. Heritability estimates for largest fibroid dimension using European Americans within BioVU.**

| Heritability Estimate $\pm$ (Std. Err.) | P-value | PC Adjustments |
|-----------------------------------------|---------|----------------|
| 0.34 $\pm$ (0.47)                       | 0.246   | 0              |
| 0.40 $\pm$ (0.47)                       | 0.209   | 1              |
| 0.40 $\pm$ (0.47)                       | 0.209   | 2              |
| 0.40 $\pm$ (0.47)                       | 0.209   | 3              |
| 0.39 $\pm$ (0.47)                       | 0.212   | 4              |
| 0.35 $\pm$ (0.47)                       | 0.238   | 5              |
| 0.36 $\pm$ (0.48)                       | 0.233   | 6              |
| 0.38 $\pm$ (0.48)                       | 0.224   | 7              |
| 0.39 $\pm$ (0.48)                       | 0.214   | 8              |
| 0.43 $\pm$ (0.48)                       | 0.195   | 9              |
| 0.44 $\pm$ (0.48)                       | 0.190   | 10             |

Model: Adjusted for age and BMI and noted PC number in table.  
 SNPs are limited to  $\geq 5\%$  MAF.

**Supplemental Table 3. Heritability estimates for largest fibroid volume using European Americans within BioVU.**

| Heritability Estimate $\pm$ (Std. Err.) | P-value | PC Adjustments |
|-----------------------------------------|---------|----------------|
| 0.12 $\pm$ (0.65)                       | 0.426   | 0              |
| 0.18 $\pm$ (0.65)                       | 0.391   | 1              |
| 0.18 $\pm$ (0.65)                       | 0.389   | 2              |
| 0.12 $\pm$ (0.66)                       | 0.427   | 3              |
| 0.13 $\pm$ (0.66)                       | 0.423   | 4              |
| 0.14 $\pm$ (0.66)                       | 0.417   | 5              |
| 0.16 $\pm$ (0.65)                       | 0.404   | 6              |
| 0.17 $\pm$ (0.67)                       | 0.399   | 7              |
| 0.24 $\pm$ (0.67)                       | 0.355   | 8              |
| 0.28 $\pm$ (0.67)                       | 0.334   | 9              |
| 0.35 $\pm$ (0.67)                       | 0.300   | 10             |

Model: Adjusted for age and BMI and noted PC number in table.  
 SNPs are limited to  $\geq 5\%$  MAF.

**Supplemental Table 4. Heritability estimates of fibroid risk with suggestive to significant regions of the genome removed from prior studies.**

| <b>Studies</b> | <b>Heritability Estimate <math>\pm</math> (Std. Err.)</b> |
|----------------|-----------------------------------------------------------|
| No Studies     | 0.33 $\pm$ (0.18)                                         |
| 1              | 0.33 $\pm$ (0.18)                                         |
| 2              | 0.33 $\pm$ (0.18)                                         |
| All Studies    | 0.34 $\pm$ (0.18)                                         |

Model: Adjusted for age, BMI, and 5 PCs.

SNPs are limited to  $\geq 5\%$  MAF.

Prevalence estimates of fibroids are set at 70%.

## References

- 1 Cha, P. C. *et al.* A genome-wide association study identifies three loci associated with susceptibility to uterine fibroids. *Nature genetics* **43**, 447-450, doi:10.1038/ng.805 (2011).
- 2 Hellwege, J. N. *et al.* A multi-stage genome-wide association study of uterine fibroids in African Americans. *Human genetics*, doi:10.1007/s00439-017-1836-1 (2017).



**Supplemental Table 5. Final sample size and SNP count for each outcome.**

| Outcome       | Sample Size | Post QC SNP Number - MAF 5% <sup>a</sup> |
|---------------|-------------|------------------------------------------|
| Fibroid Risk  |             | 4,500,362                                |
| Case          | 1,042       |                                          |
| Control       | 1,067       |                                          |
| Volume        | 373         | 4,522,829                                |
| Max Dimension | 551         | 4,518,340                                |

<sup>a</sup>Post QC SNP Numbers - These are slightly different between studies because we removed SNPs out of HWE at the end for each outcome independently.

**Supplemental Table 6. Heritability estimates for fibroid risk using European Americans within BioVU.**

| Heritability Estimate $\pm$ (Std. Err.) | P-value            | Prevalence |
|-----------------------------------------|--------------------|------------|
| 0.24 $\pm$ (0.13)                       | 0.040 <sup>a</sup> | 0.10       |
| 0.29 $\pm$ (0.16)                       | 0.040 <sup>a</sup> | 0.20       |
| 0.33 $\pm$ (0.18)                       | 0.040 <sup>a</sup> | 0.30       |
| 0.35 $\pm$ (0.19)                       | 0.040 <sup>a</sup> | 0.40       |
| 0.35 $\pm$ (0.20)                       | 0.040 <sup>a</sup> | 0.50       |
| 0.35 $\pm$ (0.19)                       | 0.040 <sup>a</sup> | 0.60       |
| 0.33 $\pm$ (0.18)                       | 0.040 <sup>a</sup> | 0.70       |
| 0.29 $\pm$ (0.16)                       | 0.040 <sup>a</sup> | 0.80       |
| 0.24 $\pm$ (0.13)                       | 0.040 <sup>a</sup> | 0.90       |

Model: Adjusted for age, BMI, and 5 PCs.

SNPs are limited to  $\geq 5\%$  MAF.

<sup>a</sup>Statistically significant
